# Supplementary material
Source: publisher site journal article supplement (https://www.dovepress.com/article/576589)
Supplement: Supplementary file 1 [file 576589%20Supplementary%20Material.docx]

Supporting Information

**

**

**Figure S1.** High-resolution XPS Pd 3d spectrum of MPI NPs.


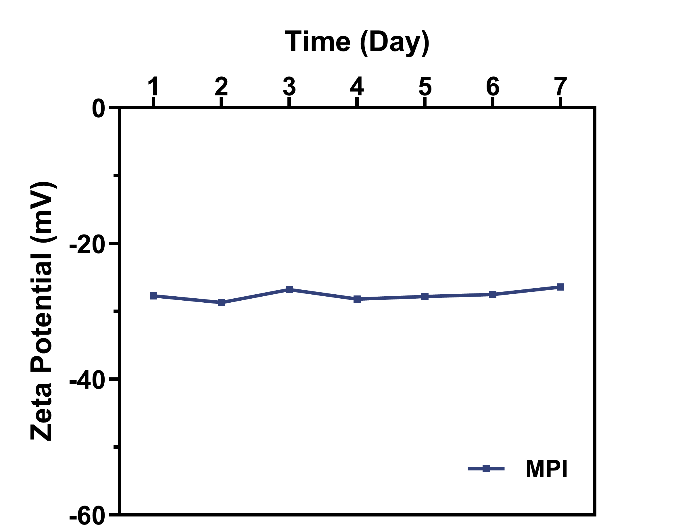


**Figure S2.** Zeta potential stability of MPI NPs in aqueous solution for 1-7 days.


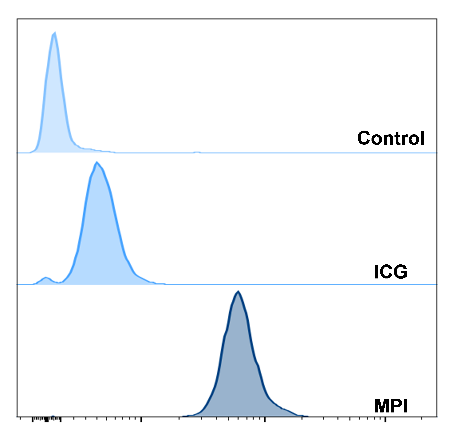


**Figure S3.** Quantitative analysis of HeLa cell uptaking by flow cytometry.


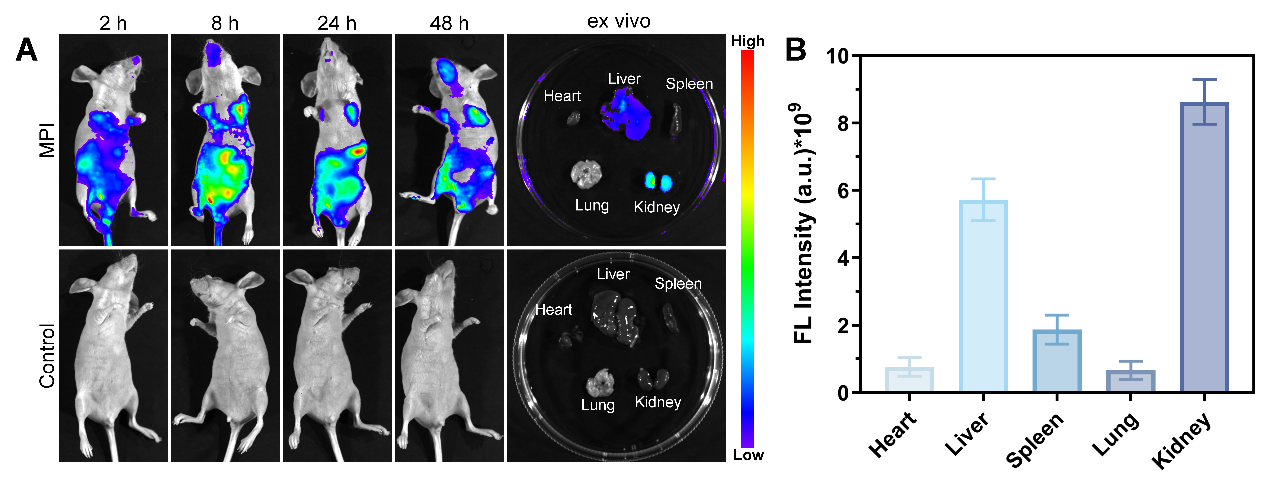


**Figure S4.** (**A**) Biodistribution of MPI NPs in mice. (**B**) Quantitative analysis of ex vivo organs fluorescence intensity.


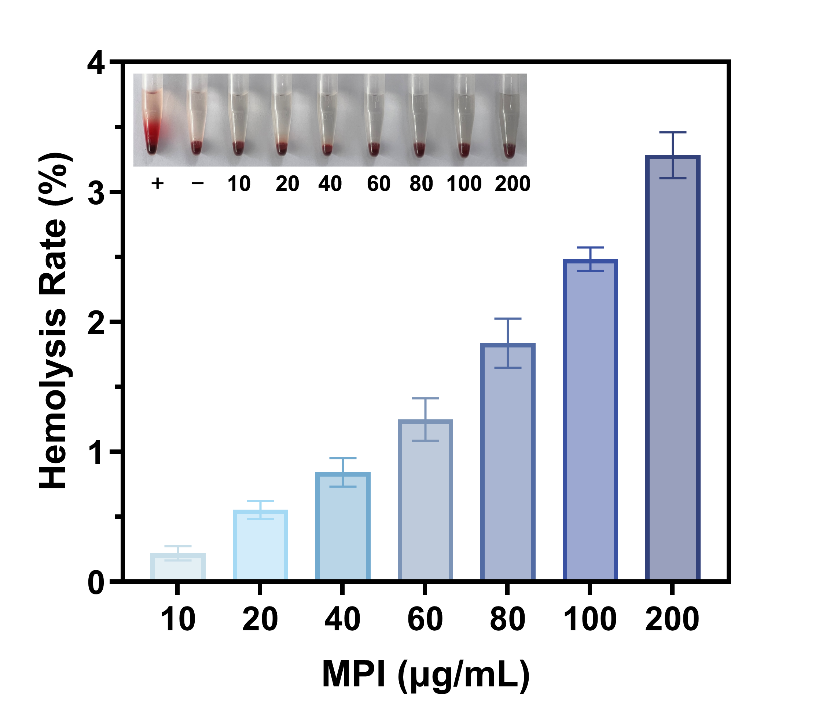


**Figure S5.** Hemolysis rate of red blood cells treated with MPI NPs at increasing concentrations from 10 to 200 µg mL-1. Physiological saline is used as a negative control and DI water is used as a positive control.

**
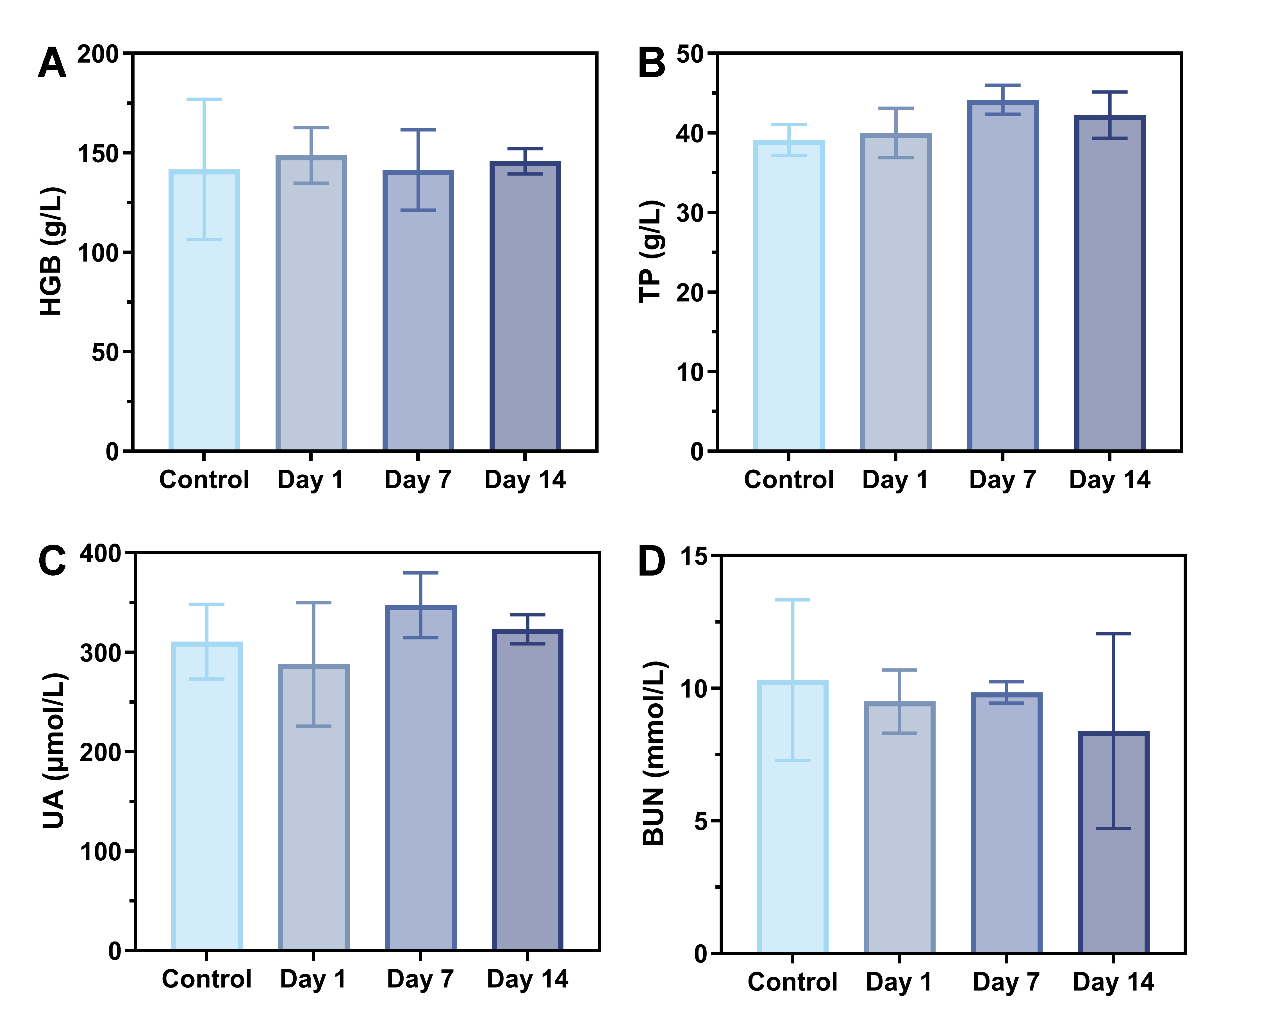
**

**Figure S6.** (**A-D**)The toxicity of MPI NPs to mice was evaluated by detecting the changes of blood routine and blood biochemical indexes (HGB, TP, UA, BUN ) in mice on Day 1, Day 7 and Day 14 of MPI NPs treatment.


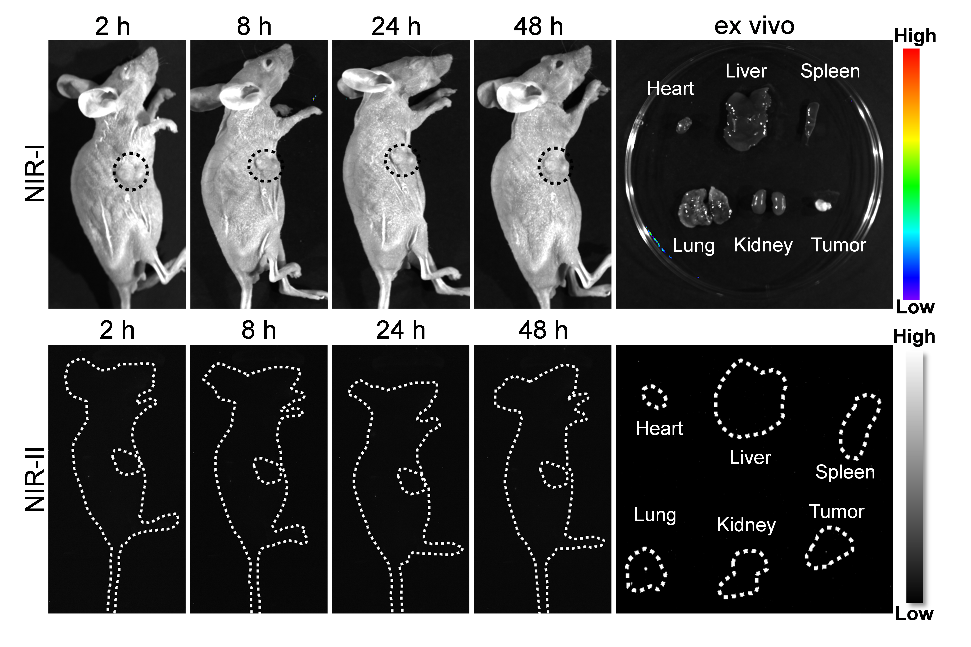


**Figure S7.** NIR-I and NIR-II fluorescence images of tumor sites at different times after tail vein injection of 1×PBS, corresponding fluorescence images of organs and tumors in 48 h (the black dashed line delineates the subcutaneous tumor region; the white dashed line outlines the body surface contour and the boundaries of the excised organs).


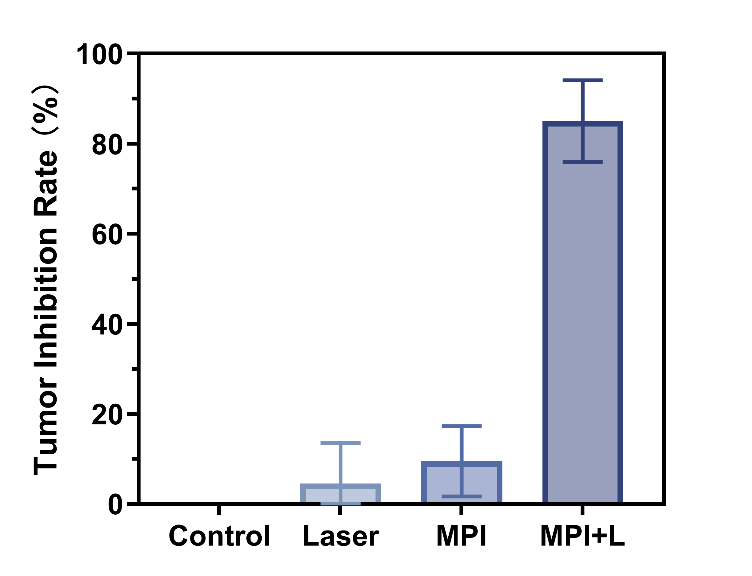


**Figure S8.** Tumor inhibition rate after different intervention treatments.


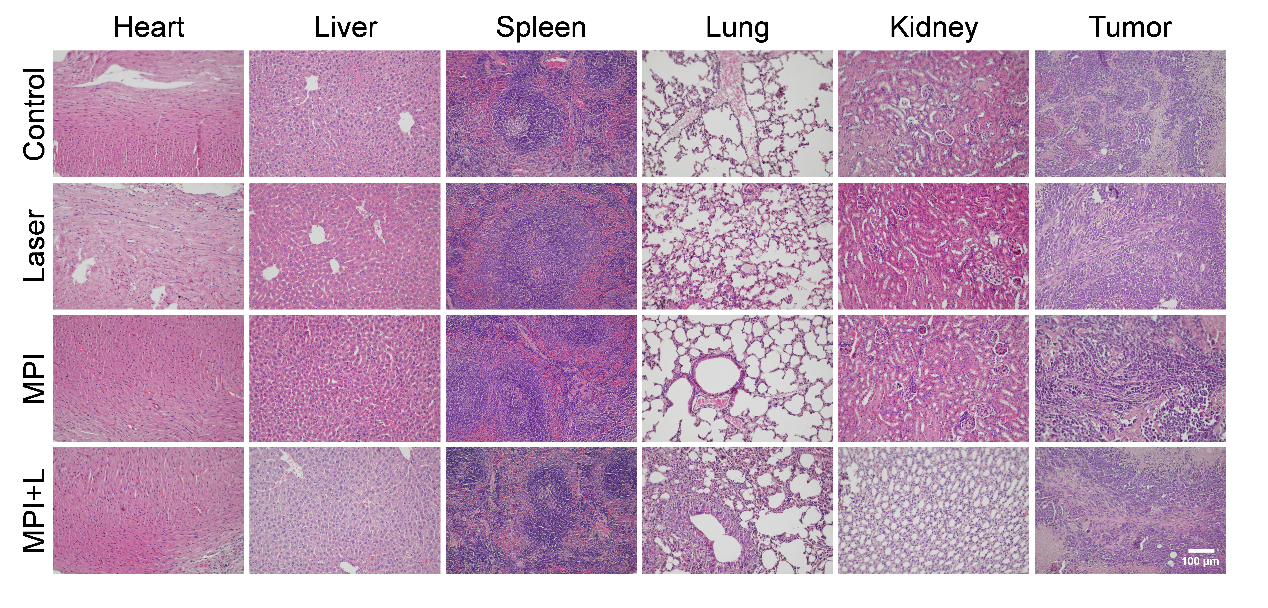
 **Figure S9.** H&E staining images of the main organs (heart, liver, spleen, lung, kidney) of mice after different intervention treatments (scale bar: 100 µm).
